# Supplementary material
Source: MDPI journal article supplement (https://www.mdpi.com/2813-0618/2/1/2)

**Supplementary Materials:**

**Supplementary Table S1. Evidence from individual cases proposed by CIOMS working group VI and the investigated items in this study**

| Evidence from individual cases [37] |                                                                             | Investigation in this research |
|-------------------------------------|-----------------------------------------------------------------------------|--------------------------------|
| 1.                                  | Positive rechallenge                                                        | No                             |
| 2.                                  | Definitive (i.e., clearly defined, well documented specific case histories) | Yes                            |
| 3.                                  | Time to onset plausible                                                     | Yes                            |
| 4.                                  | Positive dechallenge                                                        | No                             |
| 5.                                  | Lack of confounding risk factors                                            | Yes                            |
| 6.                                  | Amount and duration of exposure consistent/plausible with cause and effect  | Yes                            |
| 7.                                  | Corroboration of the accuracy of the case history                           | No                             |
| 8.                                  | Case clear-cut, easily evaluated                                            | No                             |
| 9.                                  | Co-medication unlikely to play a role                                       | Yes                            |
| 10.                                 | Investigator's causality assessment                                         | No                             |
| 11.                                 | Lack of alternative explanation                                             | No                             |

Abbreviation: CIOMS, Council for International Organizations of Medical Sciences.

**Supplementary Figure S1. Clinical course of four cases with adverse birth outcomes.**

a) Case No.1 with miscarriage under cyclophosphamide, cytarabine, daunorubicin, l-asparaginase, methotrexate, nelarabine, and vincristine. b) Case No.3 with miscarriage under imatinib. c) Case No.7 with atrial/ventricular septal defect under cyclophosphamide and doxorubicin. d) Case No.11 with miscarriage under cisplatin and fluorouracil.

Abbreviation: CT, computed tomography; DB, database.

a) No.1 (miscarriage)

Age 25, acute lymphoblastic leukemia

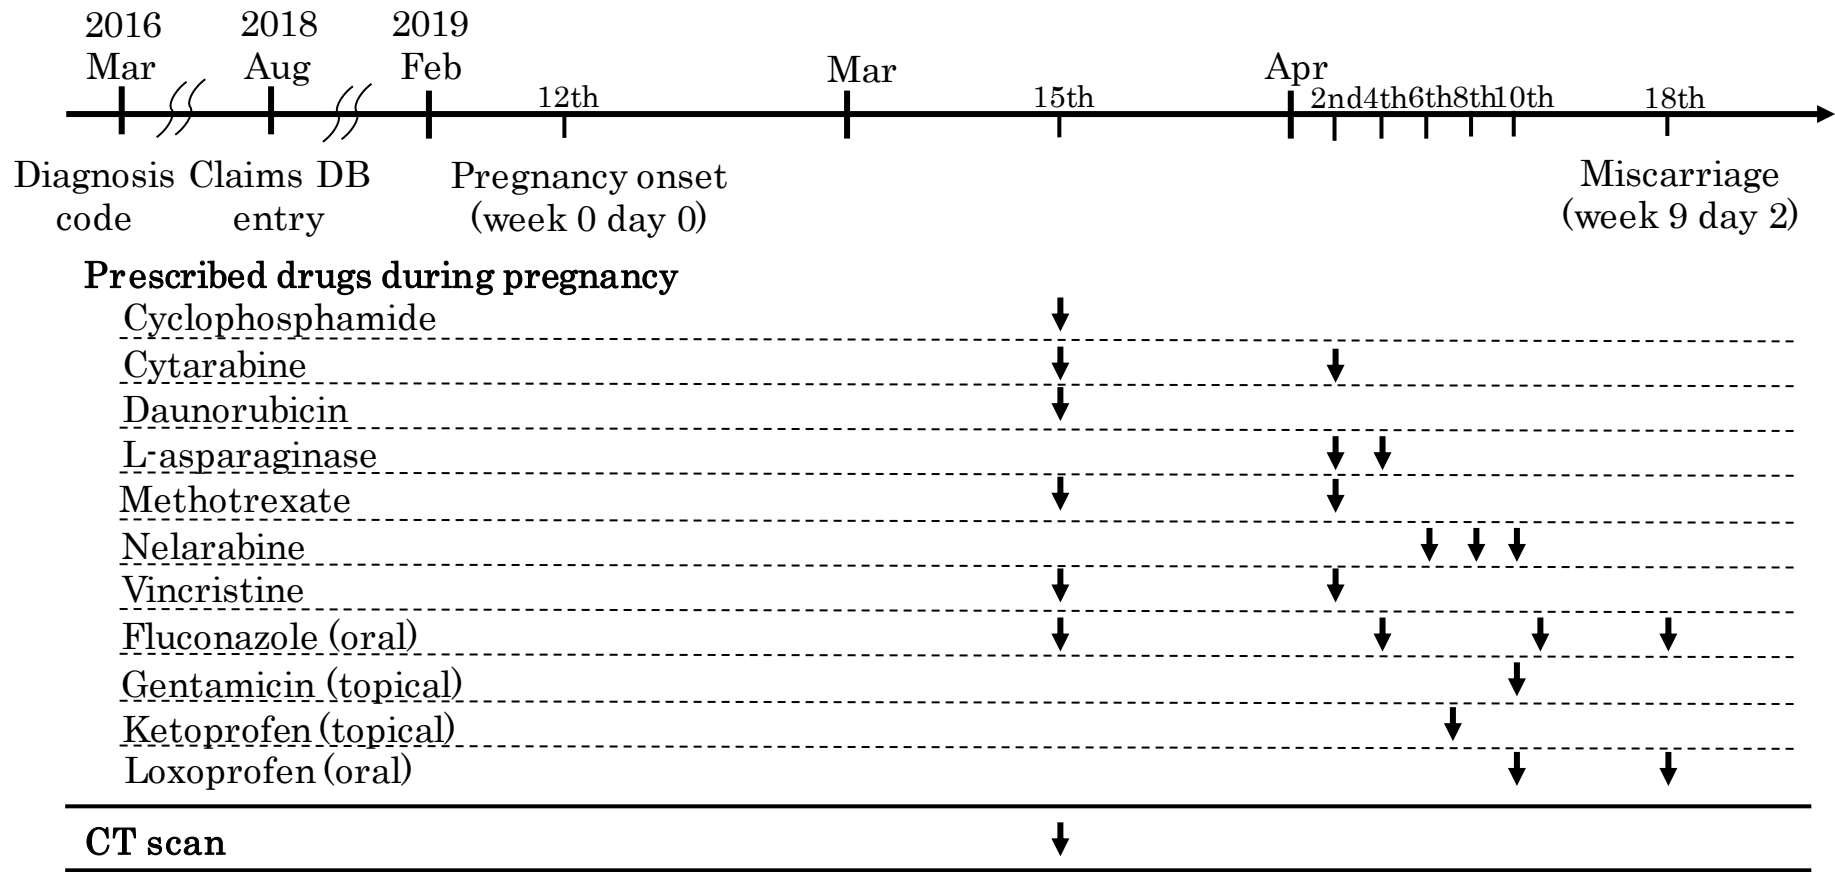

**b) No.3 (miscarriage)**

**Age 42, chronic myeloid leukemia**

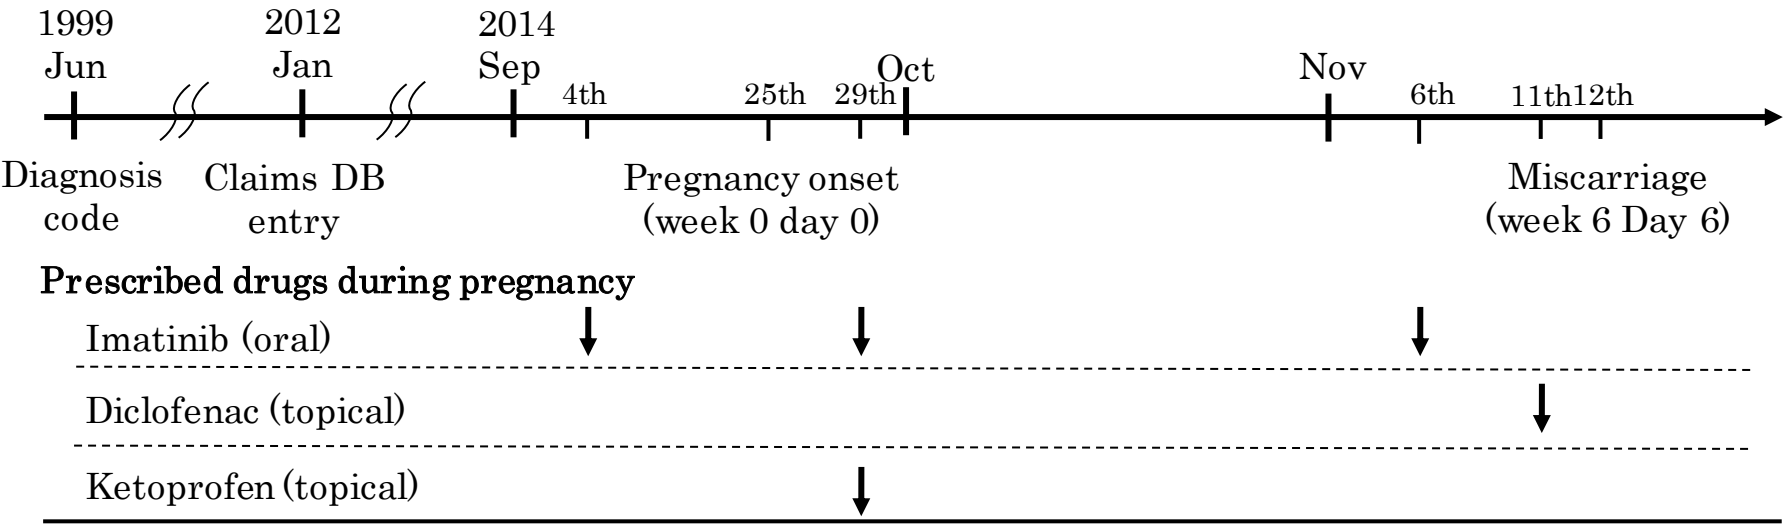

c) No.7 (atrial/ventricular septal defect)

Age 38, breast cancer

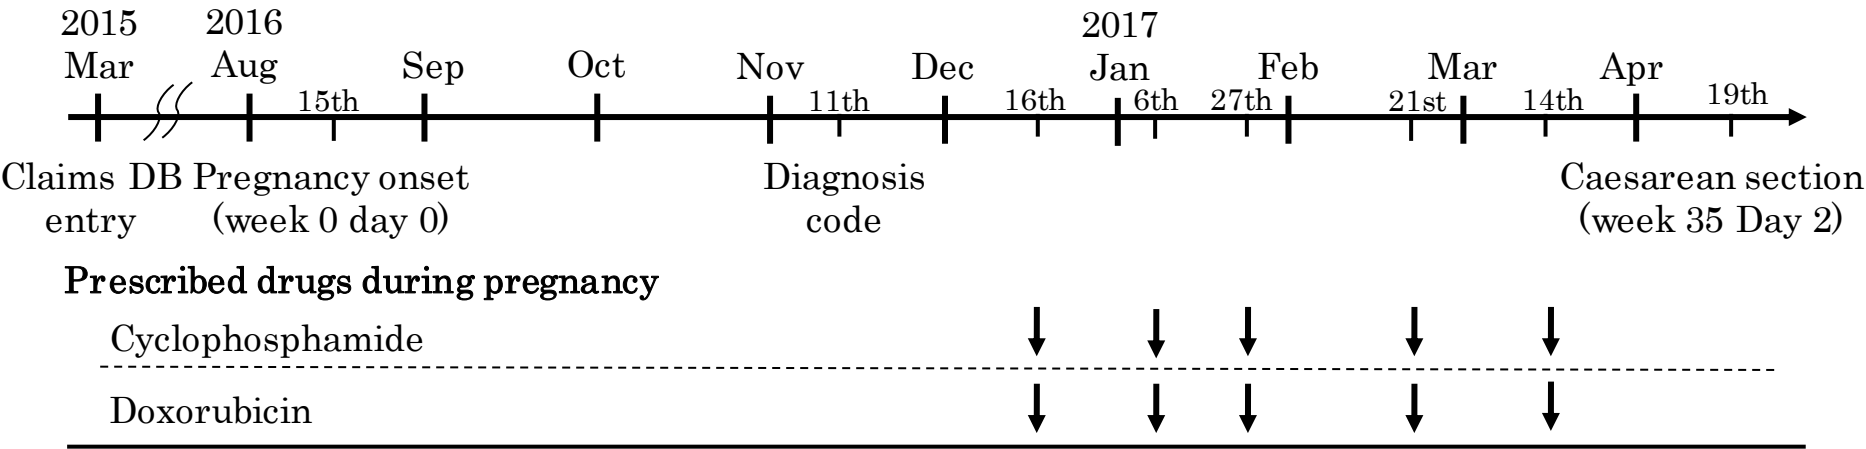

d) No.11 (miscarriage)

Age 28, cervical cancer

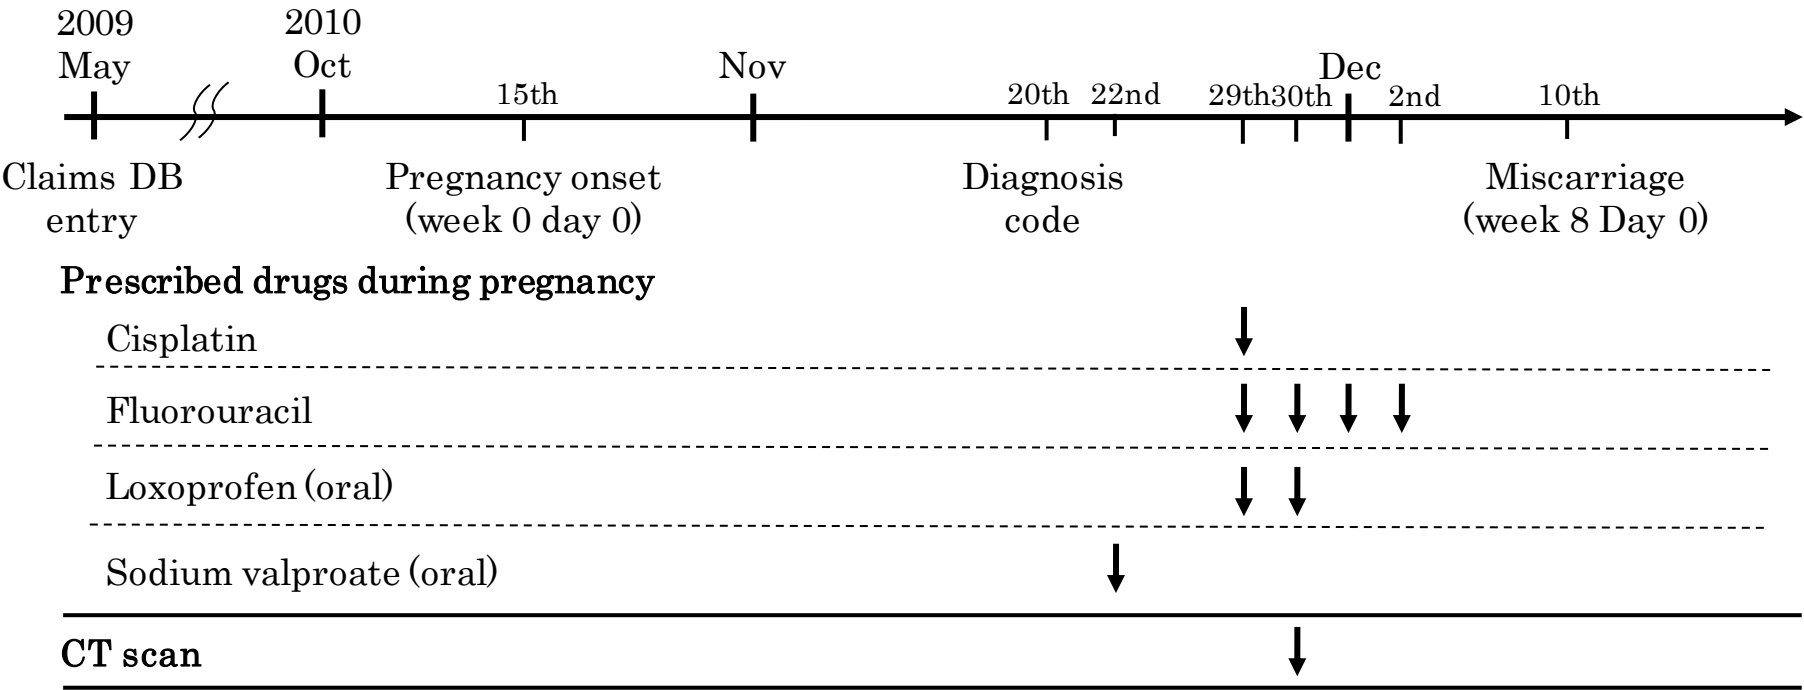

Supplement: s1 [file s1]
